# Supplementary material
Source: Springer Nature journal article supplement (https://www.springermedizin.de/resource/supplementary/12889_2012_4328_MOESM1_ESM.pdf/9492670)
Supplement: MOESM1 [file 9492670]

## Physical environment

1. In the area I live in, there are sports facilities that are always accessible (e.g. soccer fields).

none

few

several

many

2. In the area I live in, there are sports clubs.

none

few

several

many

3. In the area I live in, there are commercial sport providers (e.g. fitness clubs).

none

few

several

many

4. In the area I live in there are playgrounds.

none

few

several

many

5. How safe are the public leisure time facilities in the area you live in (in terms of problems with crime)?

very unsafe

pretty unsafe

pretty safe

very safe

6. For walking and riding a bicycle, the area I live in is

not very nice at all

not that nice

pretty nice

very nice

7. In the area I live in, shops and businesses can be reached on foot

very badly

rather badly

rather well

very well

8. From where I live, the bus and tram stops can be reached on foot

very badly

rather badly

rather well

very well

## Social support

9. How often do you do sport with your friends?

never

rarely

often

always

10. How often do you ask your friends if they want to play outside or do sport with you (e.g. playing soccer, riding a bicycle, inline skating)?

never

rarely

often

always

11. How often do your friends ask you if you want to play or do sport with them (e.g. playing soccer, riding a bicycle, inline skating)?

never

rarely

often

always

12. Do your parents support you in your sports activity (e.g. by buying sporting goods for you)?

never

rarely

often

always

13. How often is your sport a topic of conversation in your family?

never

rarely

often

always

14. How important is it for your parents that you do sport?

not important at all

a little important

pretty important

very important

15. How much of an interest do your parents have in your sport?

none at all

a little bit

pretty strong

very strong

16. How often do your parents watch you doing sport?

never

rarely

often

always
